# Supplementary material
Source: publisher figshare collection journal article supplement (https://acs.figshare.com/ndownloader/files/5163259)
Supplement: Supplementary file 1 [file 5163259]

 
data_d:\wicky\ekrech\au2se3o 
 
_audit_creation_method            SHELXL 
_chemical_name_systematic 
; 
 ? 
; 
_chemical_name_common             ? 
_chemical_formula_moiety          ? 
_chemical_formula_structural      ? 
_chemical_formula_analytical      ? 
_chemical_formula_sum             'Au2 O10 Se3' 
_chemical_formula_weight          790.81 
_chemical_melting_point           ? 
_chemical_compound_source         ? 
 
loop_ 
 _atom_type_symbol 
 _atom_type_description 
 _atom_type_scat_dispersion_real 
 _atom_type_scat_dispersion_imag 
 _atom_type_scat_source 
 'Au'  'Au'  -2.0133   8.8022 
 'International Tables Vol C Tables 4.2.6.8 and 6.1.1.4' 
 'Se'  'Se'  -0.0929   2.2259 
 'International Tables Vol C Tables 4.2.6.8 and 6.1.1.4' 
 'O'  'O'   0.0106   0.0060 
 'International Tables Vol C Tables 4.2.6.8 and 6.1.1.4' 
 
_symmetry_cell_setting            ? 
_symmetry_space_group_name_H-M    Cmc2(1) 
 
loop_ 
 _symmetry_equiv_pos_as_xyz 
 'x, y, z' 
 '-x, -y, z+1/2' 
 '-x, y, z' 
 'x, -y, z+1/2' 
 'x+1/2, y+1/2, z' 
 '-x+1/2, -y+1/2, z+1/2' 
 '-x+1/2, y+1/2, z' 
 'x+1/2, -y+1/2, z+1/2' 
 
_cell_length_a                    16.891(3) 
_cell_length_b                    6.3013(8) 
_cell_length_c                    8.3266(13) 
_cell_angle_alpha                 90.00 
_cell_angle_beta                  90.00 
_cell_angle_gamma                 90.00 
_cell_volume                      886.2(2) 
_cell_formula_units_Z             4 
_cell_measurement_temperature     293(2) 
_cell_measurement_reflns_used     ? 
_cell_measurement_theta_min       ? 
_cell_measurement_theta_max       ? 
 
_exptl_crystal_description        plate 
_exptl_crystal_colour             yellow 
_exptl_crystal_size_max           ? 
_exptl_crystal_size_mid           ? 
_exptl_crystal_size_min           ? 
_exptl_crystal_density_meas       ? 
_exptl_crystal_density_diffrn     5.927 
_exptl_crystal_density_method     ? 
_exptl_crystal_F_000              1360 
_exptl_absorpt_coefficient_mu     45.431 
_exptl_absorpt_correction_type    numerical 
_exptl_absorpt_correction_T_min   0.0156 
_exptl_absorpt_correction_T_max   0.0517 
 
_exptl_special_details 
; 
 ? 
; 
 
_diffrn_ambient_temperature       293(2) 
_diffrn_radiation_wavelength      0.71073 
_diffrn_radiation_type            MoK\a 
_diffrn_radiation_source          'fine-focus sealed tube' 
_diffrn_radiation_monochromator   graphite 
_diffrn_measurement_device        ? 
_diffrn_measurement_method        ? 
_diffrn_standards_number          ? 
_diffrn_standards_interval_count  ? 
_diffrn_standards_interval_time   ? 
_diffrn_standards_decay_%         ? 
_diffrn_reflns_number             5054 
_diffrn_reflns_av_R_equivalents   0.0800 
_diffrn_reflns_av_sigmaI/netI     0.0534 
_diffrn_reflns_limit_h_min        -22 
_diffrn_reflns_limit_h_max        22 
_diffrn_reflns_limit_k_min        -8 
_diffrn_reflns_limit_k_max        8 
_diffrn_reflns_limit_l_min        -10 
_diffrn_reflns_limit_l_max        10 
_diffrn_reflns_theta_min          2.41 
_diffrn_reflns_theta_max          28.10 
_reflns_number_total              1087 
_reflns_number_observed           905 
_reflns_observed_criterion        >2sigma(I) 
 
_computing_data_collection        ? 
_computing_cell_refinement        ? 
_computing_data_reduction         ? 
_computing_structure_solution     'SHELXS-86 (Sheldrick, 1990)' 
_computing_structure_refinement   'SHELXL-93 (Sheldrick, 1993)' 
_computing_molecular_graphics     ? 
_computing_publication_material   ? 
 
_refine_special_details 
; 
 Refinement on F^2^ for ALL reflections except for 0 with very negative F^2^ 
 or flagged by the user for potential systematic errors.  Weighted R-factors 
 wR and all goodnesses of fit S are based on F^2^, conventional R-factors R 
 are based on F, with F set to zero for negative F^2^. The observed criterion 
 of F^2^ > 2sigma(F^2^) is used only for calculating _R_factor_obs etc. and is 
 not relevant to the choice of reflections for refinement.  R-factors based 
 on F^2^ are statistically about twice as large as those based on F, and R- 
 factors based on ALL data will be even larger. 
; 
 
_refine_ls_structure_factor_coef  Fsqd  
_refine_ls_matrix_type            full 
_refine_ls_weighting_scheme 
 'calc w=1/[\s^2^(Fo^2^)+(0.0539P)^2^+0.0000P] where P=(Fo^2^+2Fc^2^)/3' 
_atom_sites_solution_primary      direct 
_atom_sites_solution_secondary    difmap 
_atom_sites_solution_hydrogens    geom 
_refine_ls_hydrogen_treatment     ? 
_refine_ls_extinction_method      SHELXL 
_refine_ls_extinction_coef        0.0019(2) 
_refine_ls_extinction_expression 
 'Fc^*^=kFc[1+0.001xFc^2^\l^3^/sin(2\q)]^-1/4^' 
_refine_ls_abs_structure_details 
 'Flack H D (1983), Acta Cryst. A39, 876-881' 
_refine_ls_abs_structure_Flack    -0.04(3) 
_refine_ls_number_reflns          1087 
_refine_ls_number_parameters      74 
_refine_ls_number_restraints      1 
_refine_ls_R_factor_all           0.0452 
_refine_ls_R_factor_obs           0.0362 
_refine_ls_wR_factor_all          0.0873 
_refine_ls_wR_factor_obs          0.0838 
_refine_ls_goodness_of_fit_all    0.986 
_refine_ls_goodness_of_fit_obs    1.044 
_refine_ls_restrained_S_all       0.985 
_refine_ls_restrained_S_obs       1.044 
_refine_ls_shift/esd_max          0.000 
_refine_ls_shift/esd_mean         0.000 
 
loop_ 
 _atom_site_label 
 _atom_site_type_symbol 
 _atom_site_fract_x 
 _atom_site_fract_y 
 _atom_site_fract_z 
 _atom_site_U_iso_or_equiv 
 _atom_site_thermal_displace_type 
 _atom_site_occupancy 
 _atom_site_calc_flag 
 _atom_site_refinement_flags 
 _atom_site_disorder_group 
Au1 Au 0.65956(3) 0.97575(8) 0.6838 0.0169(2) Uani 1 d . . 
Se1 Se 0.83863(10) 0.9677(3) 0.8042(2) 0.0182(3) Uani 1 d . . 
O11 O 0.8457(7) 0.8397(18) 0.1603(18) 0.024(3) Uani 1 d . . 
O12 O 0.6697(8) 0.2859(21) 0.6496(14) 0.024(3) Uani 1 d . . 
O13 O 0.7389(6) 0.9783(19) 0.8627(11) 0.016(2) Uani 1 d . . 
Se2 Se 0.0000 0.6405(4) 0.5325(3) 0.0195(5) Uani 1 d S . 
O21 O 0.0000 0.1976(40) 0.8797(24) 0.035(5) Uani 1 d S . 
O22 O 0.5801(7) 0.9700(21) 0.5065(15) 0.025(3) Uani 1 d . . 
O23 O 0.0000 0.7378(34) 0.7127(25) 0.038(6) Uani 1 d S . 
 
loop_ 
 _atom_site_aniso_label 
 _atom_site_aniso_U_11 
 _atom_site_aniso_U_22 
 _atom_site_aniso_U_33 
 _atom_site_aniso_U_23 
 _atom_site_aniso_U_13 
 _atom_site_aniso_U_12 
Au1 0.0202(3) 0.0104(3) 0.0202(3) -0.0005(6) -0.0004(4) 0.0003(2) 
Se1 0.0217(7) 0.0130(9) 0.0200(7) 0.0003(8) -0.0013(7) -0.0001(8) 
O11 0.028(5) 0.004(5) 0.038(9) -0.010(5) 0.004(6) 0.000(4) 
O12 0.035(6) 0.011(6) 0.026(8) -0.007(4) -0.007(5) -0.001(5) 
O13 0.010(4) 0.027(7) 0.012(5) -0.001(4) -0.001(4) 0.002(4) 
Se2 0.0223(10) 0.0145(13) 0.0218(10) 0.0019(9) 0.000 0.000 
O21 0.038(11) 0.025(11) 0.042(11) -0.018(8) 0.000 0.000 
O22 0.018(5) 0.023(7) 0.033(6) -0.007(5) 0.001(5) 0.003(5) 
O23 0.035(10) 0.039(12) 0.038(17) -0.024(10) 0.000 0.000 
 
_geom_special_details 
; 
 All esds (except the esd in the dihedral angle between two l.s. planes) 
 are estimated using the full covariance matrix.  The cell esds are taken 
 into account individually in the estimation of esds in distances, angles 
 and torsion angles; correlations between esds in cell parameters are only 
 used when they are defined by crystal symmetry.  An approximate (isotropic) 
 treatment of cell esds is used for estimating esds involving l.s. planes. 
; 
 
loop_ 
 _geom_bond_atom_site_label_1 
 _geom_bond_atom_site_label_2 
 _geom_bond_distance 
 _geom_bond_site_symmetry_2 
 _geom_bond_publ_flag 
Au1 O12 1.982(13) 1_565 ? 
Au1 O22 1.995(12) . ? 
Au1 O11 1.999(12) 6_665 ? 
Au1 O13 2.004(10) . ? 
Se1 O11 1.709(13) 4_575 ? 
Se1 O12 1.729(12) 7_655 ? 
Se1 O13 1.756(11) . ? 
O11 Se1 1.709(13) 4_574 ? 
O11 Au1 1.999(12) 6_664 ? 
O12 Se1 1.729(12) 7_645 ? 
O12 Au1 1.982(13) 1_545 ? 
Se2 O23 1.62(2) . ? 
Se2 O21 1.63(2) 2_564 ? 
Se2 O22 1.741(13) 7_545 ? 
Se2 O22 1.741(13) 5_445 ? 
O21 Se2 1.63(2) 2_565 ? 
O22 Se2 1.741(13) 5 ? 
 
loop_ 
 _geom_angle_atom_site_label_1 
 _geom_angle_atom_site_label_2 
 _geom_angle_atom_site_label_3 
 _geom_angle 
 _geom_angle_site_symmetry_1 
 _geom_angle_site_symmetry_3 
 _geom_angle_publ_flag 
O12 Au1 O22 88.3(5) 1_565 . ? 
O12 Au1 O11 165.9(6) 1_565 6_665 ? 
O22 Au1 O11 83.1(5) . 6_665 ? 
O12 Au1 O13 92.4(5) 1_565 . ? 
O22 Au1 O13 179.3(5) . . ? 
O11 Au1 O13 96.3(5) 6_665 . ? 
O11 Se1 O12 87.4(7) 4_575 7_655 ? 
O11 Se1 O13 103.6(5) 4_575 . ? 
O12 Se1 O13 98.8(6) 7_655 . ? 
Se1 O11 Au1 129.4(8) 4_574 6_664 ? 
Se1 O12 Au1 122.6(7) 7_645 1_545 ? 
Se1 O13 Au1 115.8(5) . . ? 
O23 Se2 O21 119.1(12) . 2_564 ? 
O23 Se2 O22 110.4(6) . 7_545 ? 
O21 Se2 O22 106.8(7) 2_564 7_545 ? 
O23 Se2 O22 110.4(6) . 5_445 ? 
O21 Se2 O22 106.8(7) 2_564 5_445 ? 
O22 Se2 O22 102.0(9) 7_545 5_445 ? 
Se2 O22 Au1 114.8(6) 5 . ? 
 
_refine_diff_density_max    3.147 
_refine_diff_density_min   -2.565 
_refine_diff_density_rms    0.535 
